# Supplementary figures and images for: The concept of skeletal muscle memory: Evidence from animal and human studies
Source: PubMed Central journal article supplement — Acta Physiol (Oxf). 2020 Apr 3;229(3):e13465. doi: 10.1111/apha.13465 (PMC7317456; doi:10.1111/apha.13465), 2020-04-03

**A** Young (20-29 yrs)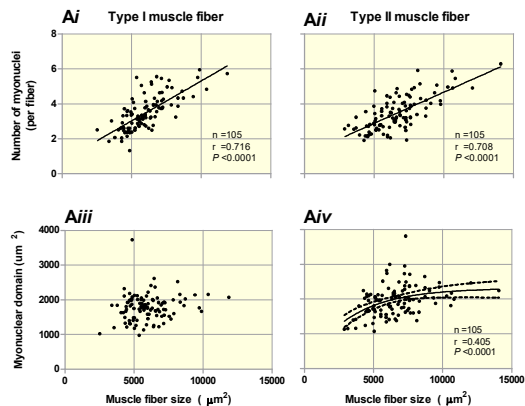**B** Older (60-69 yrs)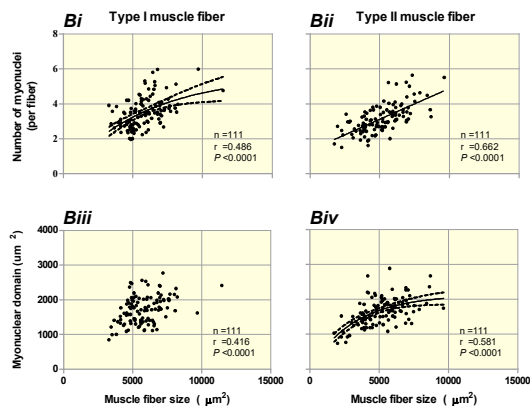**C** Older (70-79 yrs)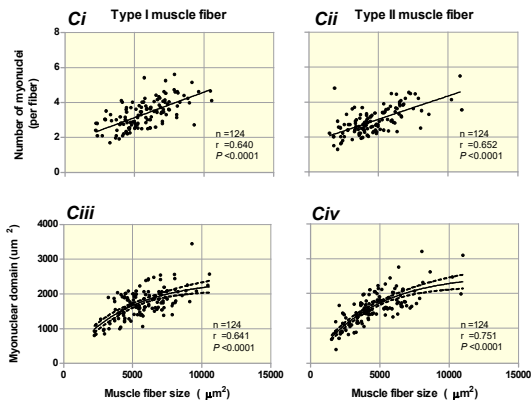**D** Older (80-89 yrs)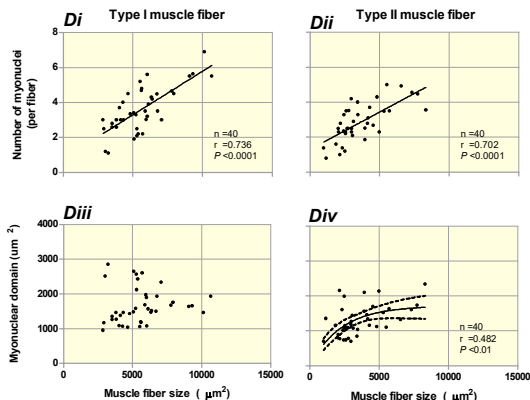

Supplement: APHA-229-e13465-s001.pdf [file APHA-229-e13465-s001.pdf]
